# Supplementary material for: Impact of Disruption and Drying Conditions on Physicochemical, Functional and Antioxidant Properties of Powdered Ingredients Obtained from Brassica Vegetable By-Products
Source: MDPI journal article supplement (doi:10.3390/foods11223663), 2022-11-16
Supplement: s1 [file s1]

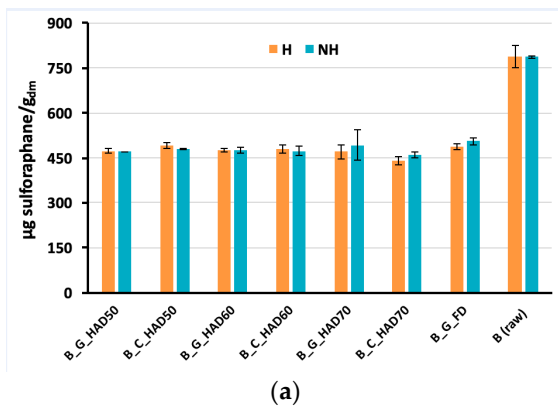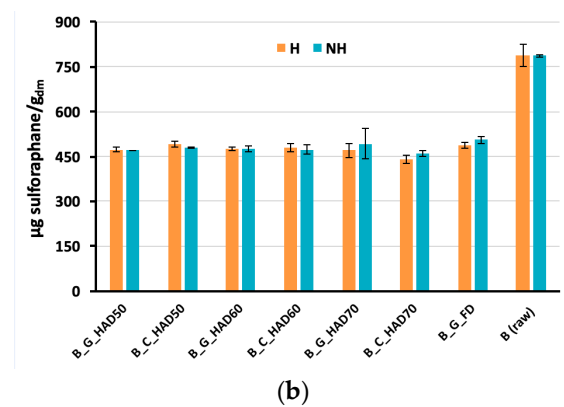

**Figure S1.** Sulforaphane content ( $\mu\text{g/gdm}$ ) in cabbage (a) and broccoli (b) samples. H: with hydrolysis; NH: without hydrolysis. WC: white cabbage; B: broccoli; G: ground; C: chopped; HAD: hot-air drying; FD: freeze drying.
